# Supplementary material for: Can a shock-induced phonon up-pumping model relate to impact sensitivity of molecular crystals, polymorphs and cocrystals?
Source: Royal Society of Chemistry journal article supplement (doi:10.1039/d2ra05062e), 2022-01-01

# $\beta$ -HMX

$\omega_{\max} = 176 \text{ cm}^{-1}$

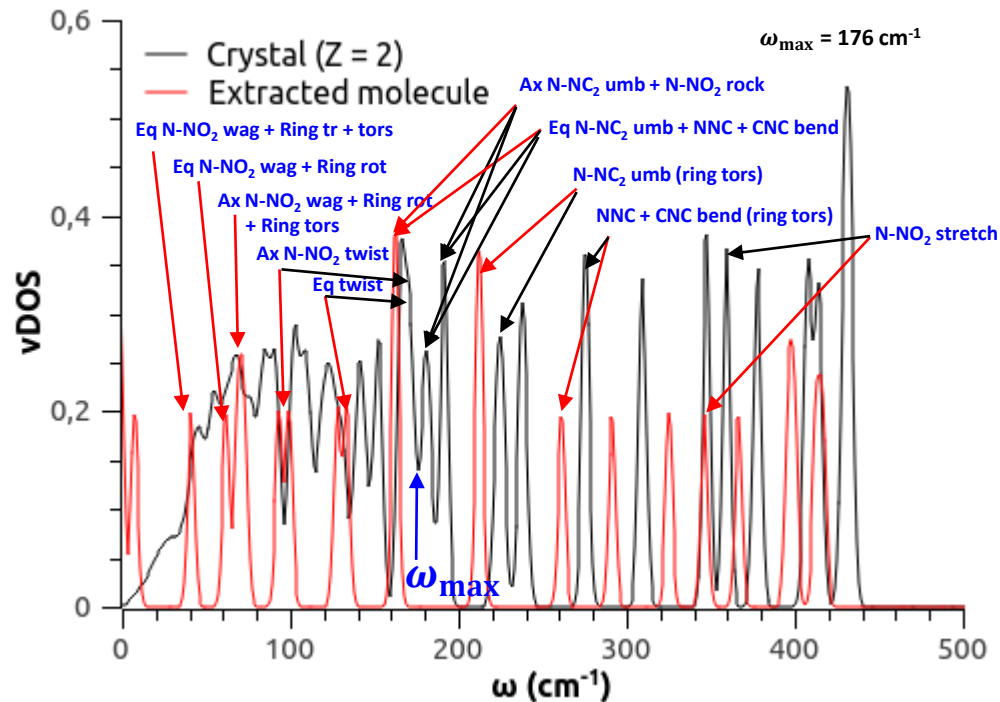

# $\delta$ -HMX

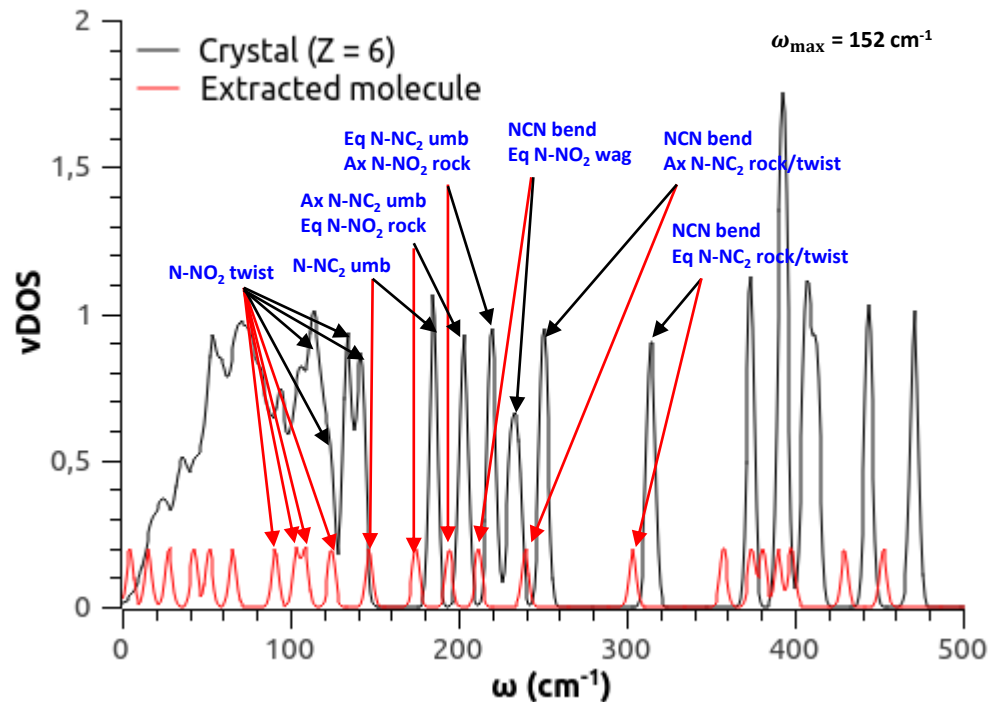

# $\alpha$ -FOX-7

C-C twist degenerated in the crystal

$$\omega_{\max} = 172 \text{ cm}^{-1}$$

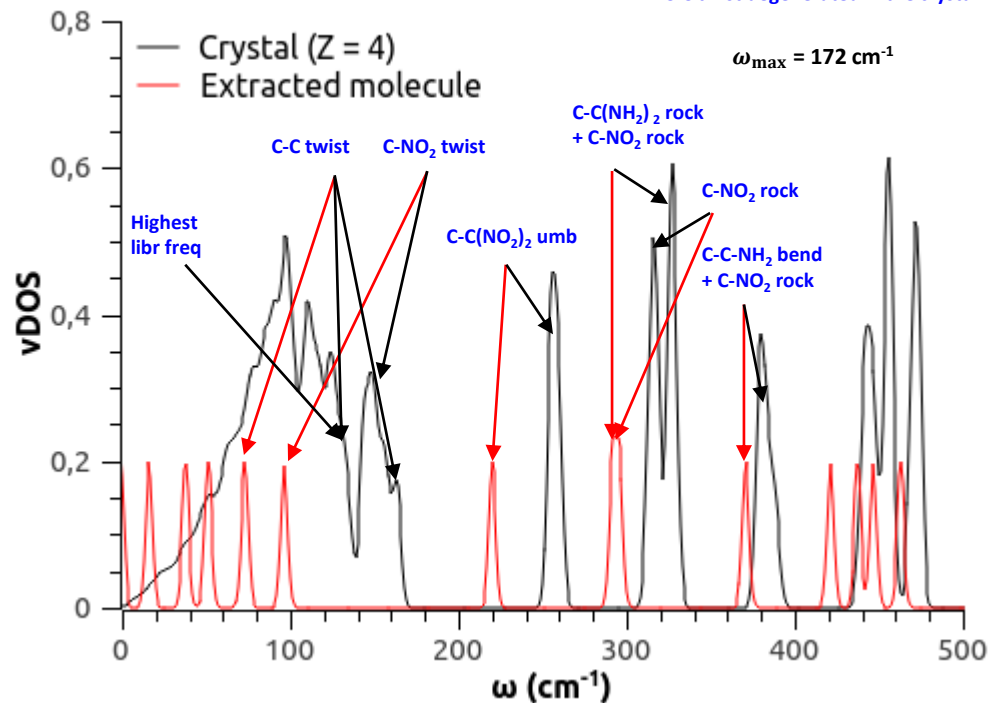

# BTF

$$\omega_{\max} = 153 \text{ cm}^{-1}$$

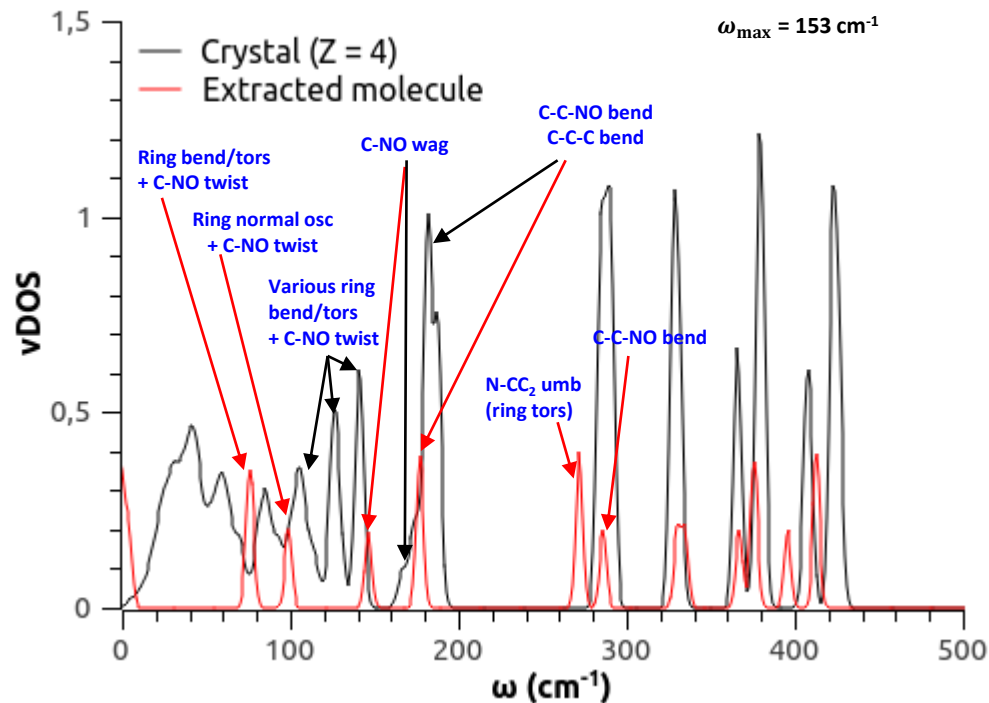

# TATB

$\omega_{\max} = 133 \text{ cm}^{-1}$  (excl. C-NH<sub>2</sub> wag)

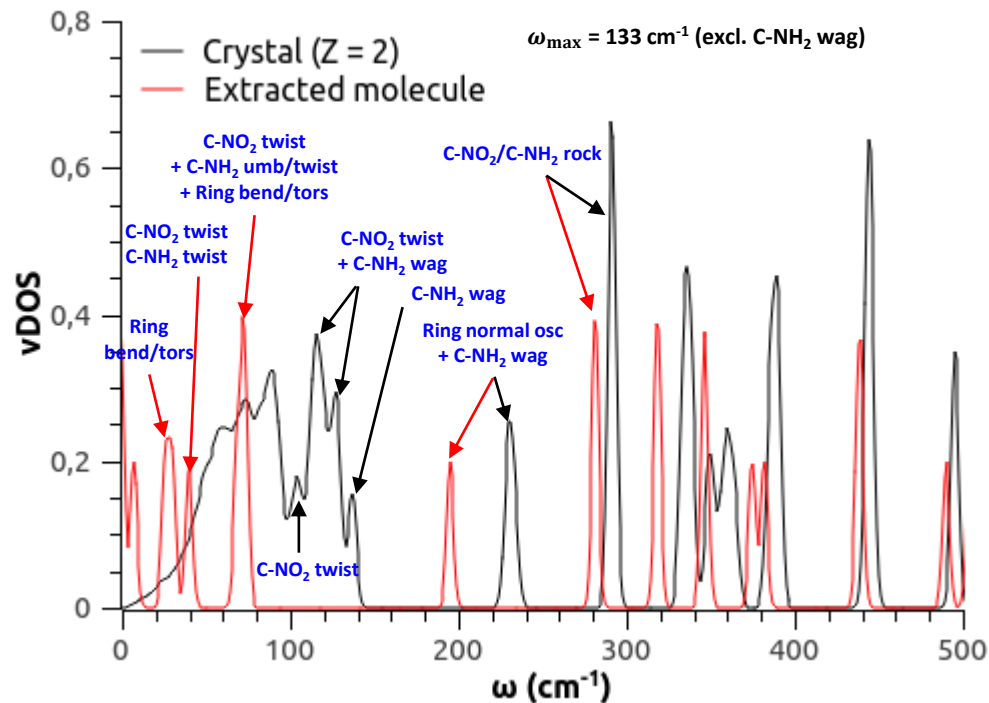

# HNB

$$\omega_{\max} = 166 \text{ cm}^{-1}$$

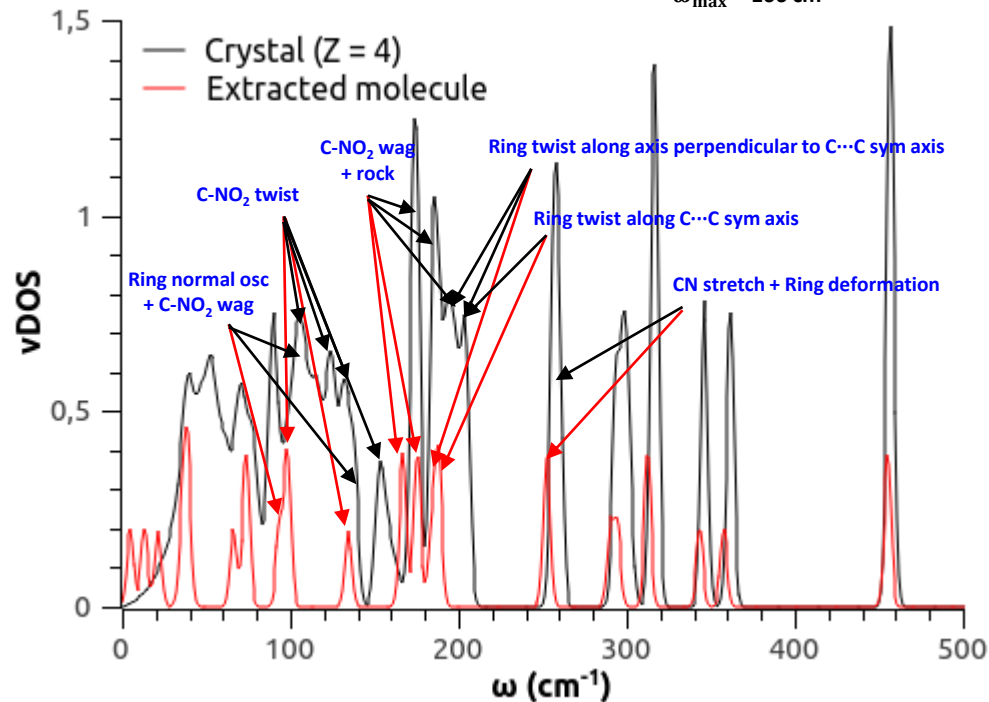

TNB

 $\omega_{\max} = 152 \text{ cm}^{-1}$ 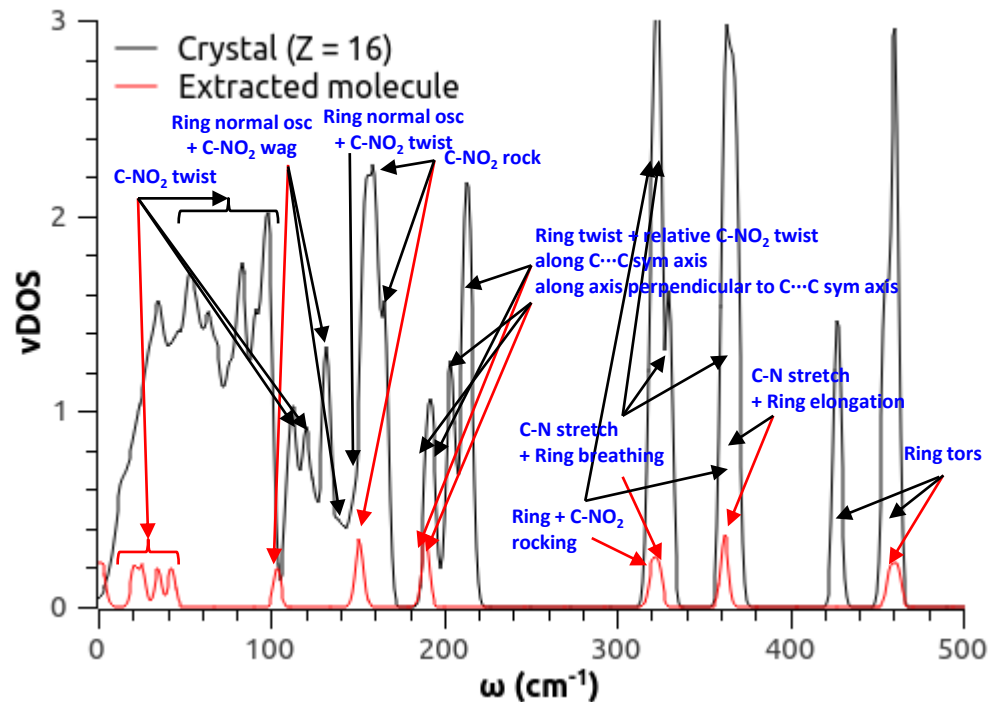

# $\alpha$ -NTO

$$\omega_{\max} = 171 \text{ cm}^{-1}$$

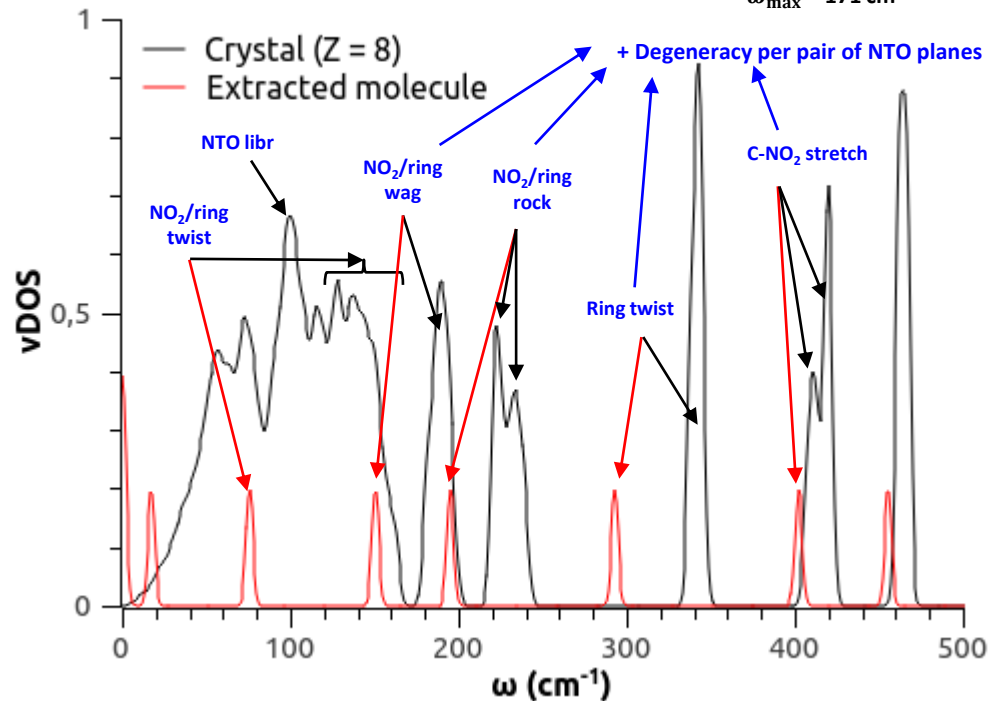



# PETN-I

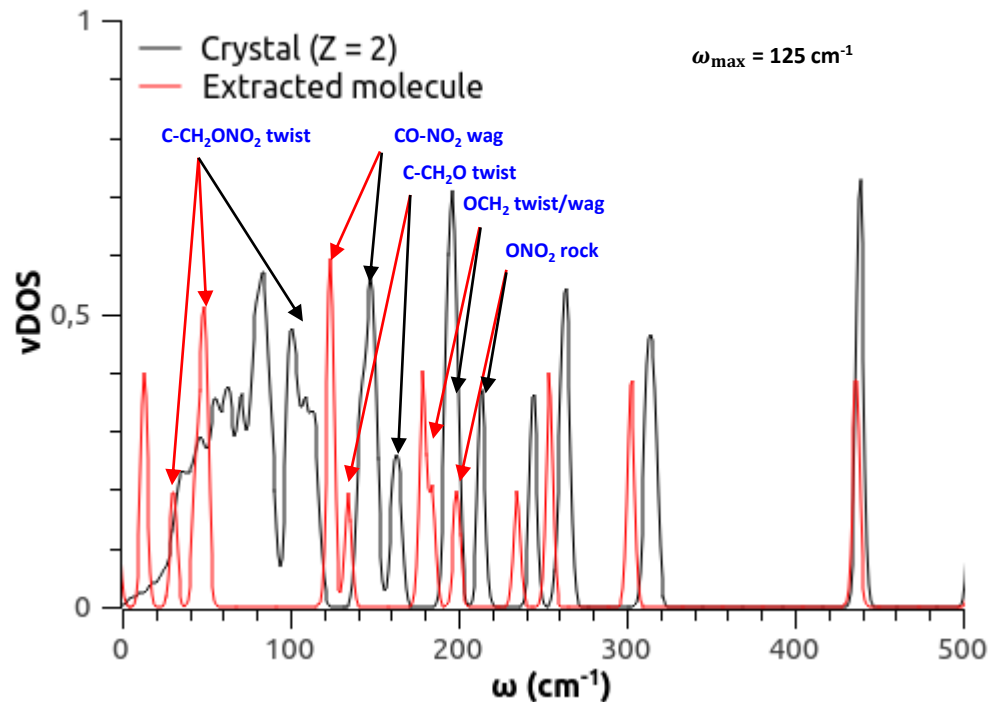

# $\epsilon$ -CL20

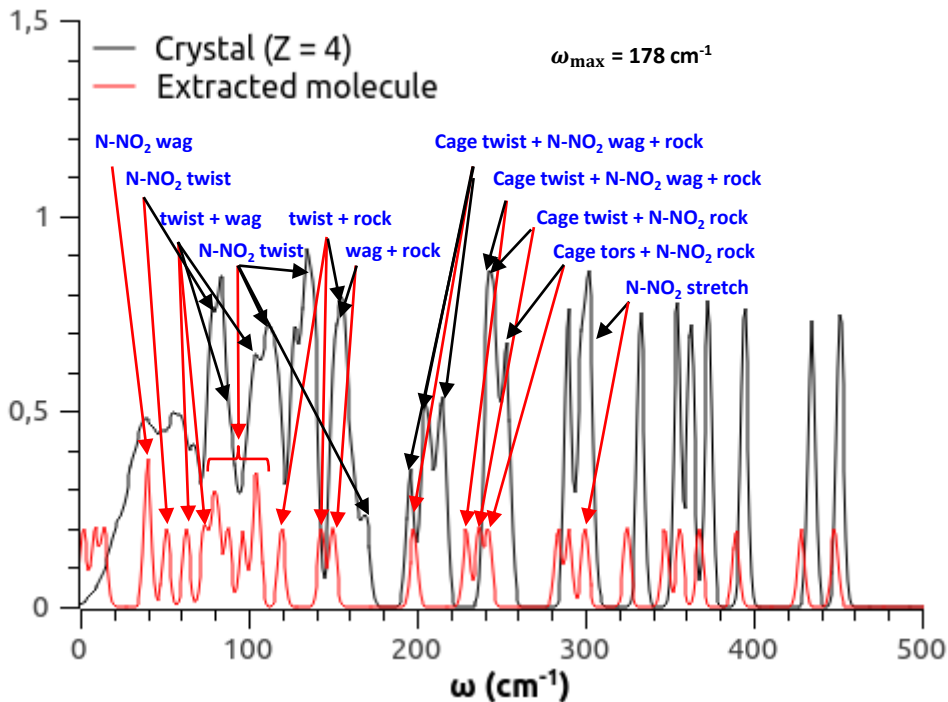

# $\beta$ -CL20

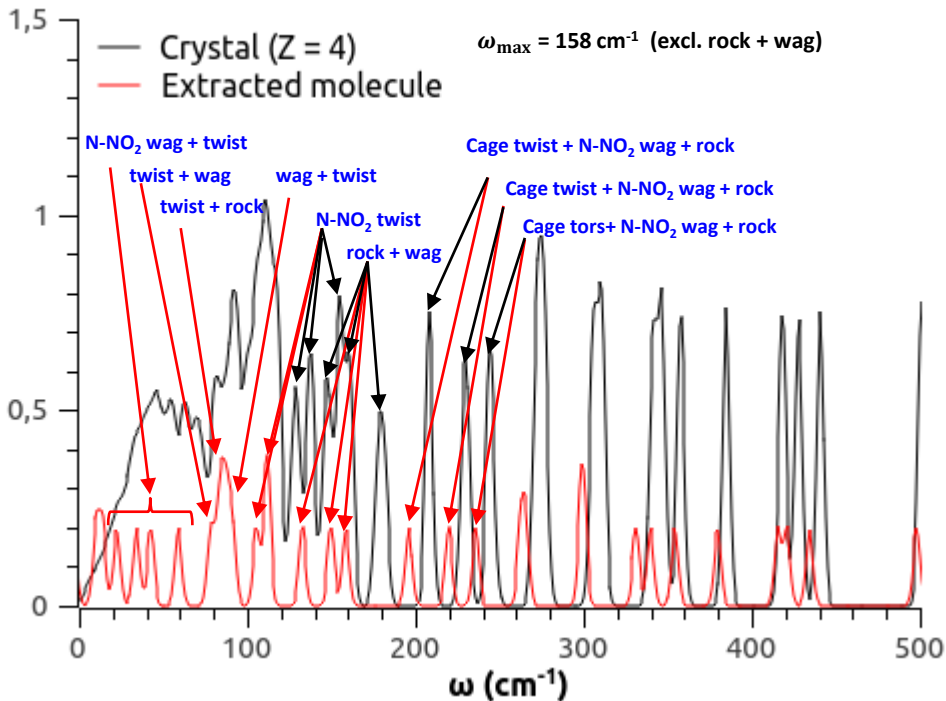

# $\gamma$ -CL20

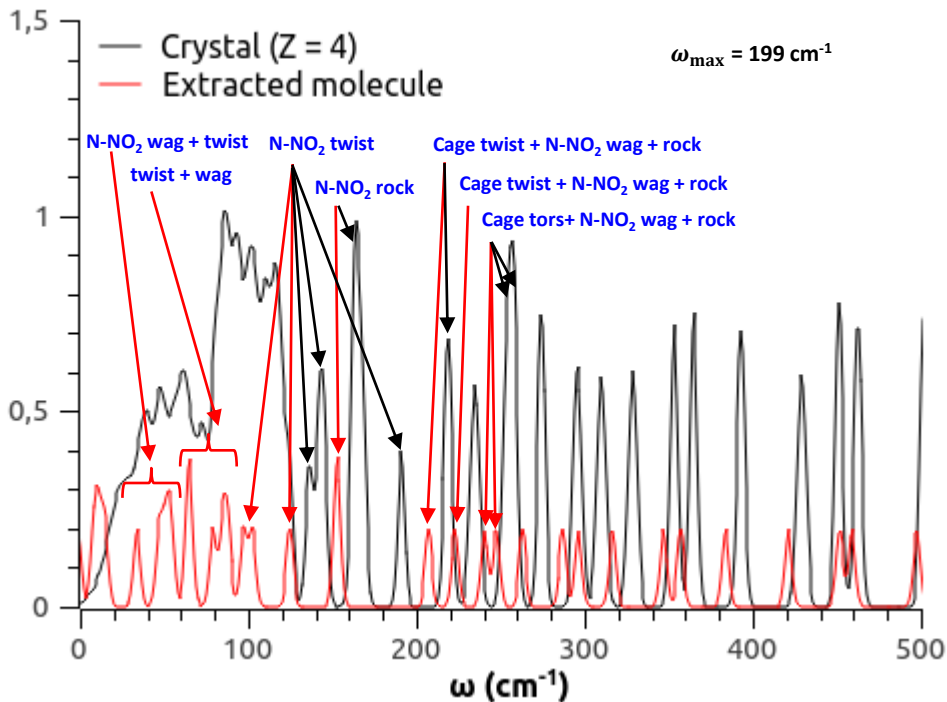

# $\alpha$ -CL20

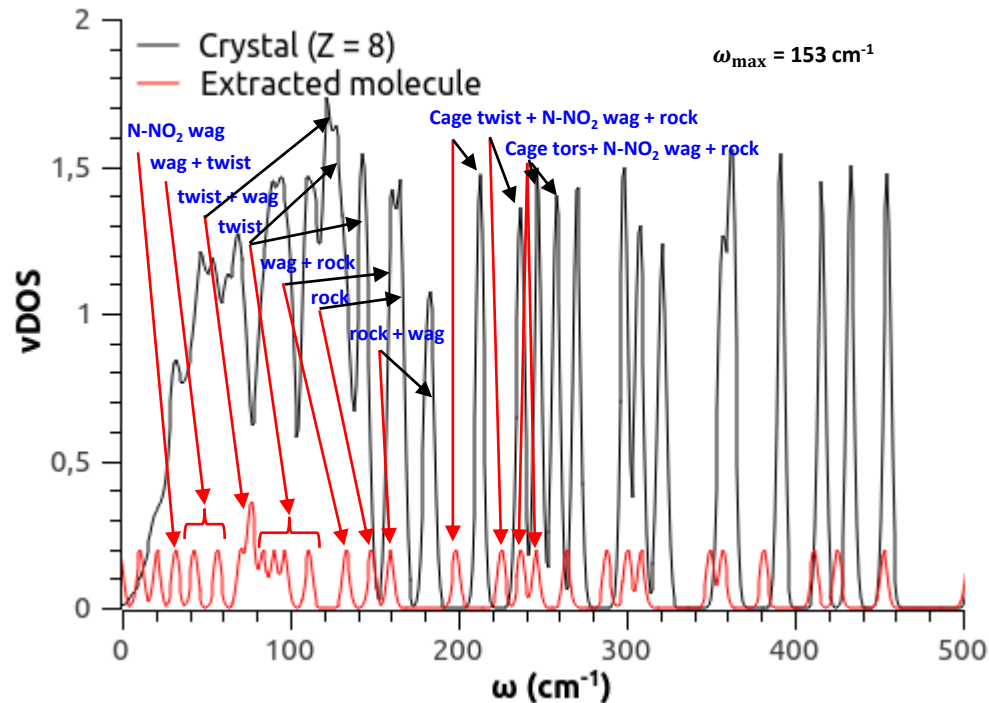

# 2CL20:1HMX

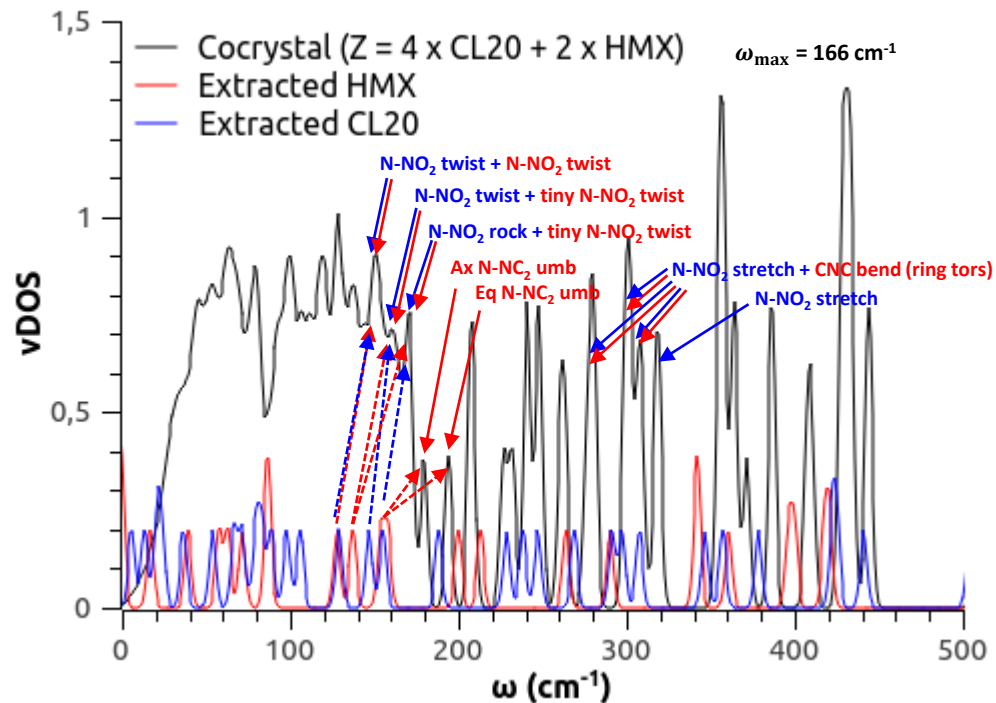

# DATB

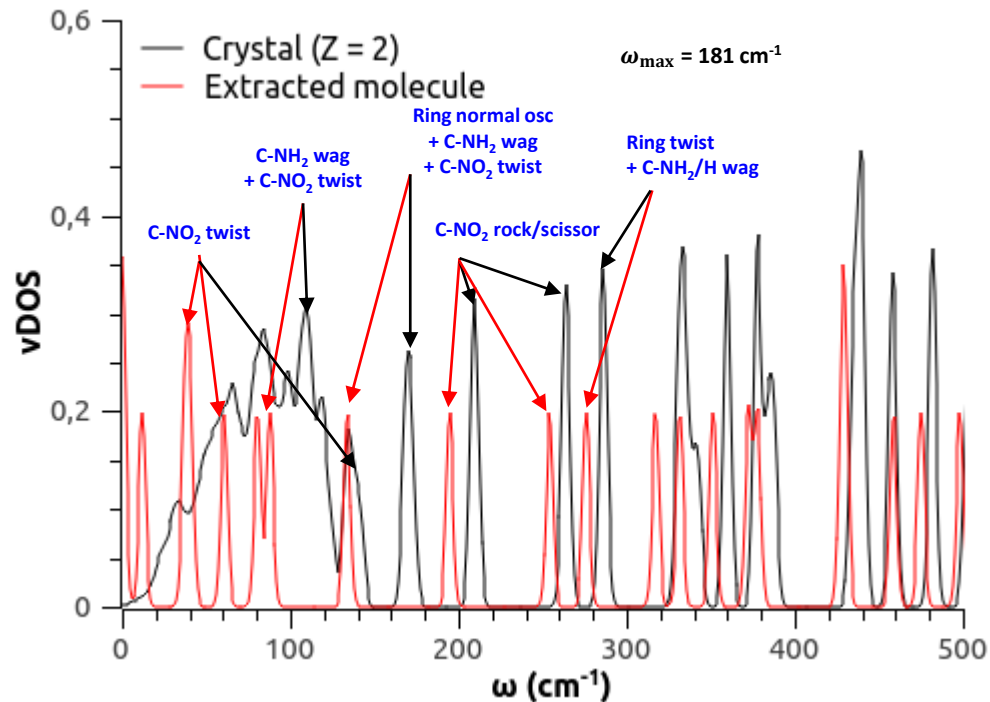

# MATB

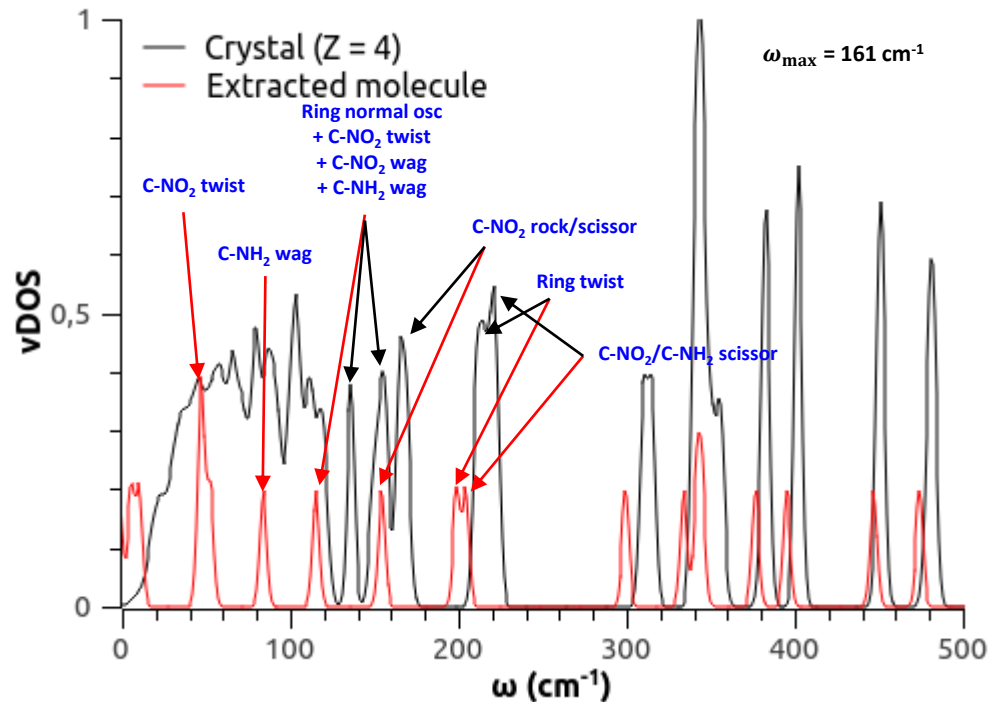



# Tetryl

$$\omega_{\max} = 204 \text{ cm}^{-1}$$

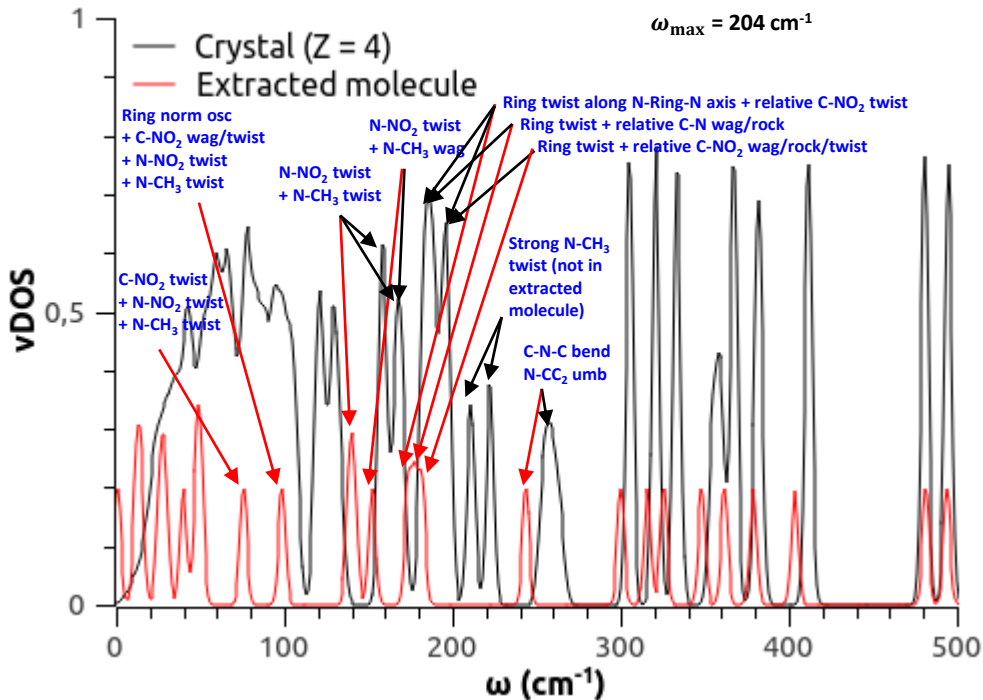

# HNS

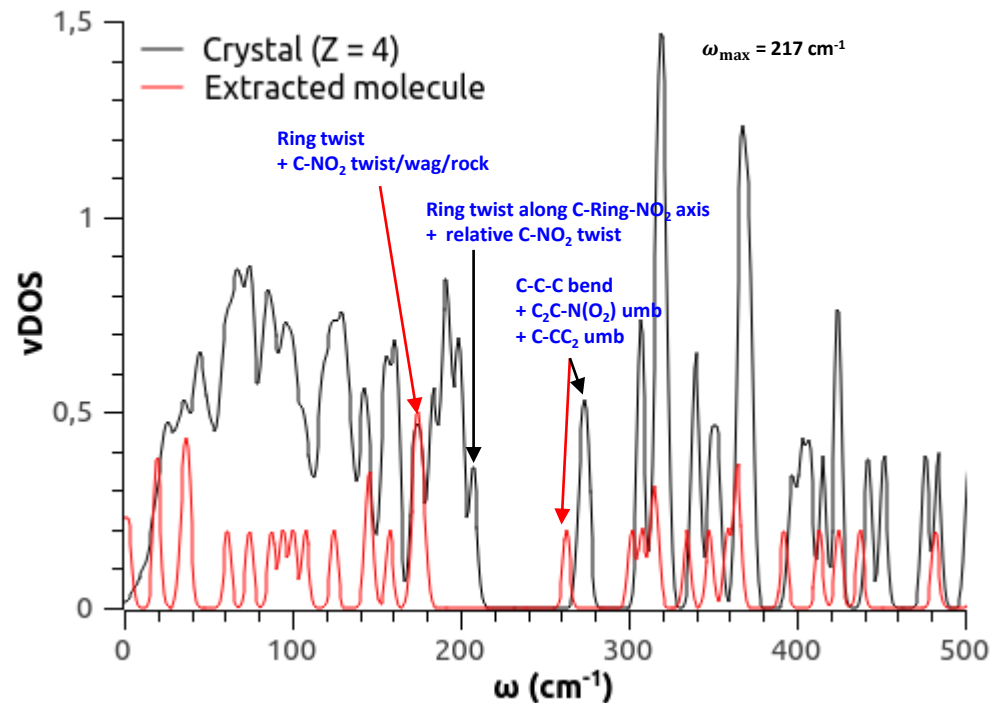

# HNAB

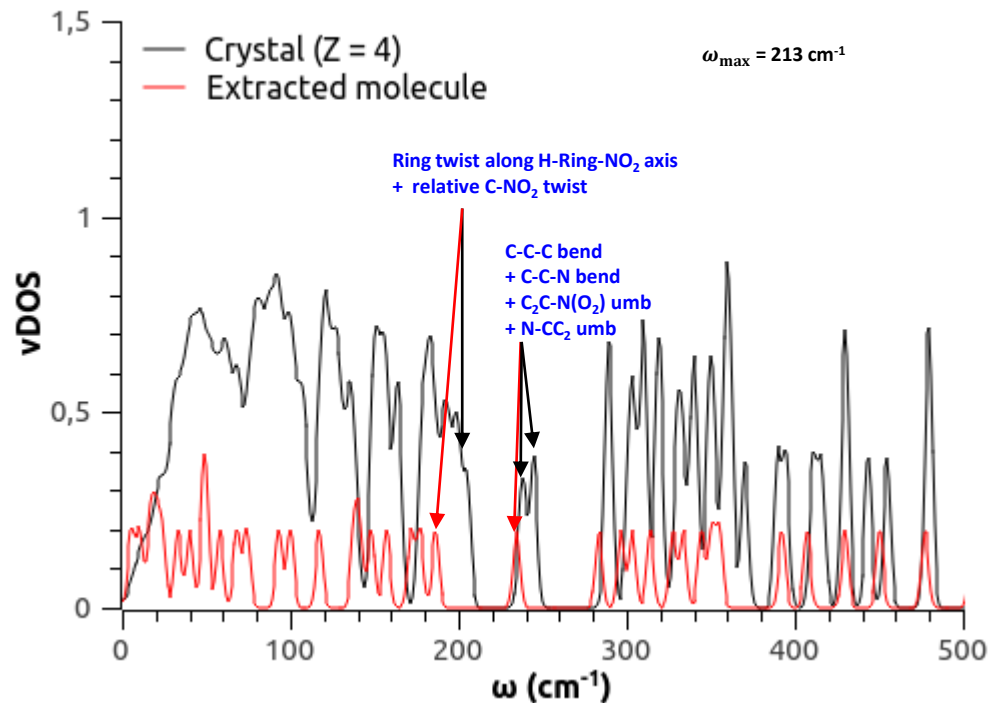

# DIPAM

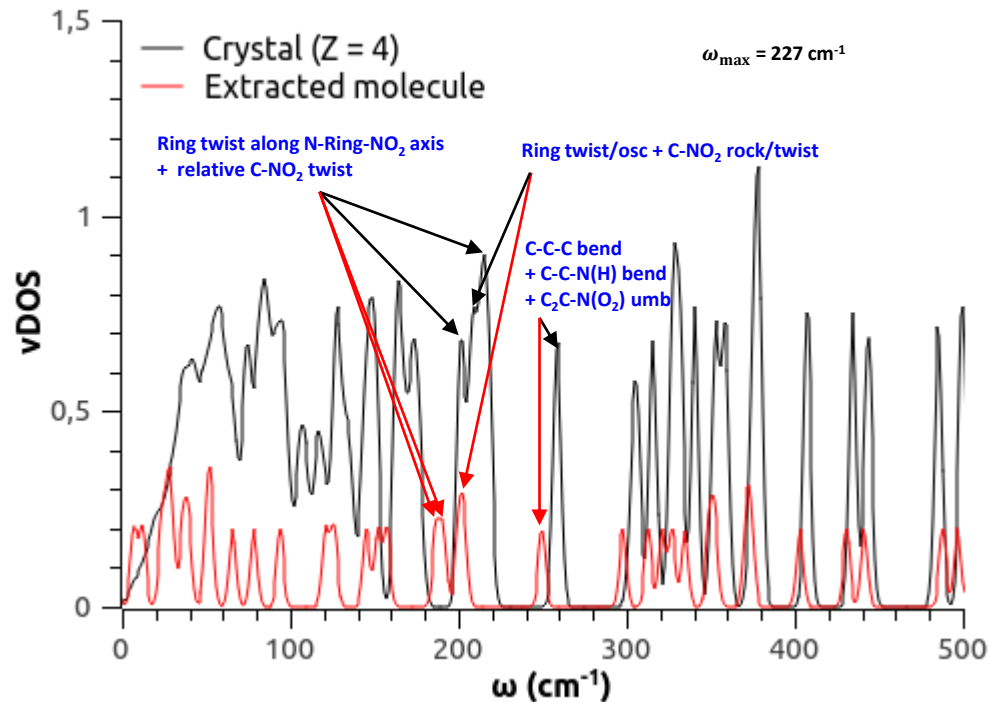

Supplement: d2ra05062e2.zip [file d2ra05062e2.zip]
