# Supplementary material for: Can a shock-induced phonon up-pumping model relate to impact sensitivity of molecular crystals, polymorphs and cocrystals?
Source: Royal Society of Chemistry journal article supplement (doi:10.1039/d2ra05062e), 2022-01-01
Supplement: d2ra05062e1.pdf [file d2ra05062e1.pdf]

## Electronic Supplementary Information

for

### Can shock-induced phonon up-pumping model relate to impact sensitivity of molecular crystals, polymorphs and cocrystals?

X. Bidault<sup>1,a)</sup> and S. Chaudhuri<sup>1,2,b)</sup>

<sup>1</sup> *Department of Civil, Materials and Environmental Engineering, University of Illinois at Chicago, Chicago, Illinois 60607, United States*

<sup>2</sup> *Applied Materials Division, Argonne National Laboratory, Lemont, IL 60439, United States*

<sup>a)</sup> Corresponding author: [xavbdl@uic.edu](mailto:xavbdl@uic.edu)

<sup>b)</sup> Electronic mail: [santc@uic.edu](mailto:santc@uic.edu)

#### 1. Evaluation of the “nitroaromatics” model for nitramines

The model of Deng *et al.* [1] was devised to predict shock sensitivity of nitroaromatics, using molecular descriptors (the numbers  $nC$ ,  $nH$ ,  $nN$  and  $nO$  of Carbon, Hydrogen, Nitrogen and Oxygen atoms, respectively, the Oxygen balance  $OB$  and the molecular weight  $MW$ ) and a crystal descriptor (the bulk modulus). Definitions and formulas can be found in their paper. Their Equation (13) is the one used to predict  $h_{50}$ :

$$\log_2 h_{50} = 3.65 \frac{OB \cdot MW}{nH - MW} + 3.4 \frac{\sqrt[3]{nO}}{nN \cdot K} + 0.72 \frac{nH \cdot \sqrt[2]{K}}{nC} + 3.3$$

Presently, the bulk modulus is derived from DFT-D calculations, using Quantum Espresso, PBE-D2, PSlib 1.0.0 US PP with a cutoff of 90 Ry (more details can be found in Section II.A. of the manuscript). Using variable-cell relaxation at -2, 0 and +2 kbar, the bulk modulus is calculated as

$$K_T = -V_0 \frac{\partial P}{\partial V}$$

where  $V_0$  is the volume at 0 kbar, and the differential term is approximated by the finite differences between values at -2 and +2 kbar. This method using PBE-D2 and PP was already shown to yield lattice parameters very close to values at ambient conditions [2] (see also Table SIII). The calculated bulk modulus is thus considered at ambient conditions. The results are reported in Table SI. The density and bulk modulus are indeed close to known ambient experimental data. While  $h_{50}$  is rather well predicted for aromatic nitramine (TATB and TNT), very large errors appear for non-aromatic nitramines. FOX-7 is found much less sensitive than TATB, and  $\beta$ -HMX even less, with its  $h_{50}$  higher than 800 cm. Going deeper and considering polymorphs, this model

erroneously predicts  $\beta$ - and  $\delta$ -HMX similarly insensitive, whereas both are experimentally sensitive, and  $\delta$ -HMX even more than  $\beta$ -HMX [3]. Then,  $\beta$ - and  $\epsilon$ -CL20 are predicted with sensitivity similar to TNT, whereas both are experimentally more than that, and  $\beta$ -CL20 more than  $\epsilon$ -CL20 [4]. This model lacks of transferability and obviously needs a parameterization for nitramines.

**Table SI.** Sensitivity prediction from the “nitroaromatics” model applied to a few nitroaromatics and nitramines. The deviation (*%dev*) of density and bulk modulus are in reference to ambient experimental data found in [2]. The deviation (*%dev*) of  $h_{50}$  is in reference to experimental data reported in the main manuscript.

|                                                                                                                                                            | MW      | OB         | Density<br>(%dev) | K (GPa)<br>(%dev) | log2( $h_{50}$ ) | $h_{50}$ (cm)<br>(%dev)  |
|------------------------------------------------------------------------------------------------------------------------------------------------------------|---------|------------|-------------------|-------------------|------------------|--------------------------|
| <b>TATB</b><br>(C <sub>6</sub> H <sub>6</sub> O <sub>6</sub> N <sub>6</sub> )                                                                              | 268.15  | -0.5370129 | 1.975<br>(+1.9)   | 13.3<br>(+2.6)    | 8.01             | <b>258</b><br>(-47)      |
| <b>o-TNT</b><br>(C <sub>7</sub> H <sub>5</sub> O <sub>6</sub> N <sub>3</sub> )                                                                             | 227.15  | -0.7395994 | 1.65*             | 6.77*             | 6.29             | <b>78.4</b><br>(+48/-23) |
| <b><math>\alpha</math>-FOX-7</b><br>(C <sub>2</sub> H <sub>4</sub> O <sub>4</sub> N <sub>4</sub> )                                                         | 148.08  | -0.2160994 | 1.915<br>(+1.1)   | 13.1<br>(+4.0)    | 9.42             | <b>685</b><br>(+444)     |
| <b><math>\beta</math>-HMX</b><br>(C <sub>4</sub> H <sub>8</sub> O <sub>8</sub> N <sub>8</sub> )                                                            | 296.155 | -0.2161030 | 1.911<br>(+0.6)   | 15.3<br>(+3.9)    | 9.79             | <b>886</b><br>(+2585)    |
| <b><math>\delta</math>-HMX</b><br>(C <sub>4</sub> H <sub>8</sub> O <sub>8</sub> N <sub>8</sub> )                                                           | 296.155 | -0.2161030 | 1.777             | 14.7              | 9.69             | <b>827</b>               |
| <b><math>\epsilon</math>-CL20</b><br>(C <sub>6</sub> H <sub>6</sub> O <sub>12</sub> N <sub>12</sub> )                                                      | 438.185 | -0.1095428 | 1.997<br>(-2.3)   | 11.5<br>(-4.6)    | 6.20             | <b>73.5</b><br>(+315)    |
| <b><math>\beta</math>-CL20</b><br>(C <sub>6</sub> H <sub>6</sub> O <sub>12</sub> N <sub>12</sub> )                                                         | 438.185 | -0.1095428 | 1.959             | 11.1              | 6.16             | <b>71.4</b><br>(+449)    |
| <b><math>\gamma</math>-CL20</b><br>(C <sub>6</sub> H <sub>6</sub> O <sub>12</sub> N <sub>12</sub> )                                                        | 438.185 | -0.1095428 | 1.886             | 13.1              | 6.36             | <b>82.0</b>              |
| <b>2CL20:1HMX</b><br>(C <sub>6</sub> H <sub>6</sub> O <sub>12</sub> N <sub>12</sub> +<br>1/2 C <sub>4</sub> H <sub>8</sub> O <sub>8</sub> N <sub>8</sub> ) | 586.25  | -0.1364605 | 1.943             | 13.7              | 7.18             | <b>145</b>               |

## 2. Phonon density of states of $\beta$ -HMX from DFT-D – Issues when using only the Gamma point

The method to calculate the vibrational density of states (vDOS) can be found in Section II.B. of the manuscript and in Ref. [2]. The  $\beta$ -HMX lattice parameters are first optimized at zero pressure using either Quantum Espresso (single cell and 3x2x3 off-grid k-points) or CP2K (2x1x2 supercell and the Gamma point), using various pseudo potentials (PP) and even one all-electron (AE) simulation. The results are reported in Table SII. To determine their phonon density of states, the supercell method as implemented in Phonopy is used on 2x1x2 supercells, large enough for a single k-point. For every DFT-D combination, the respective vDOS are displayed in Fig. S1. It shows evidence that only the combination using a single cell with the Gamma point (red dotted curve) results in a vDOS which strongly differs from the other combinations, especially in the low-frequency range and with significant negative frequencies. This choice could fit high-throughput considerations, concerning fast calculations, but the lattice/intermolecular vibrations are poorly described. We consider this an

issue when quantifying shock sensitivity based on an up-pumping scheme from the phonon bath. For this reason, we avoided in the present study this less accurate and cheap combination.

**Table SII.**  $\beta$ -HMX unit-cell from variable-cell relaxation using different DFT-D methods. The *italic* value under every lattice parameter is the percentage deviation *%dev* from the experimental data at 303 K taken from ref. CCDC 792930. QE uses a single cell with a mesh of 3x2x3 off-grid k-points. CP2K uses a 2x1x2 supercell and the Gamma point. NLCC is used for all PP.

|             |            |    |                |         |                       | a (Å)        | b (Å)         | c (Å)        | $\beta$ (°)   | v (Å <sup>3</sup> ) |
|-------------|------------|----|----------------|---------|-----------------------|--------------|---------------|--------------|---------------|---------------------|
| <b>Exp.</b> |            |    |                |         |                       | <b>6.526</b> | <b>11.037</b> | <b>7.364</b> | <b>102.67</b> | <b>517.45</b>       |
| QE          | PBE-D2     | PP | PSlib1.0.0     | 90 Ry   | 3x2x3 (off-grid)      | 6.560        | 10.856        | 7.404        | 102.60        | 514.53              |
| <i>%dev</i> |            |    |                |         |                       | <i>+0.5</i>  | <i>-1.6</i>   | <i>+0.5</i>  | <i>-0.1</i>   | <i>-0.6</i>         |
| QE          | PBE-D2     | PP | PseudoDojo Std | 120 Ry  | 3x2x3 (off-grid)      | 6.547        | 10.905        | 7.224        | 102.56        | 512.35              |
| <i>%dev</i> |            |    |                |         |                       | <i>+0.3</i>  | <i>-1.2</i>   | <i>-1.9</i>  | <i>-0.1</i>   | <i>-1.0</i>         |
| QE          | PBE-D2     | PP | ONCV 1.2       | 400 Ry  | 3x2x3 (off-grid)      | 6.551        | 10.907        | 7.239        | 102.62        | 512.22              |
| <i>%dev</i> |            |    |                |         |                       | <i>+0.4</i>  | <i>-1.2</i>   | <i>-1.7</i>  | <i>-0.0</i>   | <i>-1.0</i>         |
| CP2K        | PBE-D2     | PP | GTH-mTZVP      | 1500 Ry | Superc. 2x1x2 + Gamma | 6.556        | 10.915        | 7.366        | 102.67        | 514.30              |
| <i>%dev</i> |            |    |                |         |                       | <i>+0.5</i>  | <i>-1.1</i>   | <i>+0.0</i>  | <i>0.0</i>    | <i>-0.6</i>         |
| CP2K        | PBE-D3(BJ) | AE | AE 6-311G**    | 1500 Ry | Superc. 2x1x2 + Gamma | 6.548        | 10.900        | 7.291        | 102.90        | 507.25              |
| <i>%dev</i> |            |    |                |         |                       | <i>+0.3</i>  | <i>-1.2</i>   | <i>-1.0</i>  | <i>+0.2</i>   | <i>-2.0</i>         |

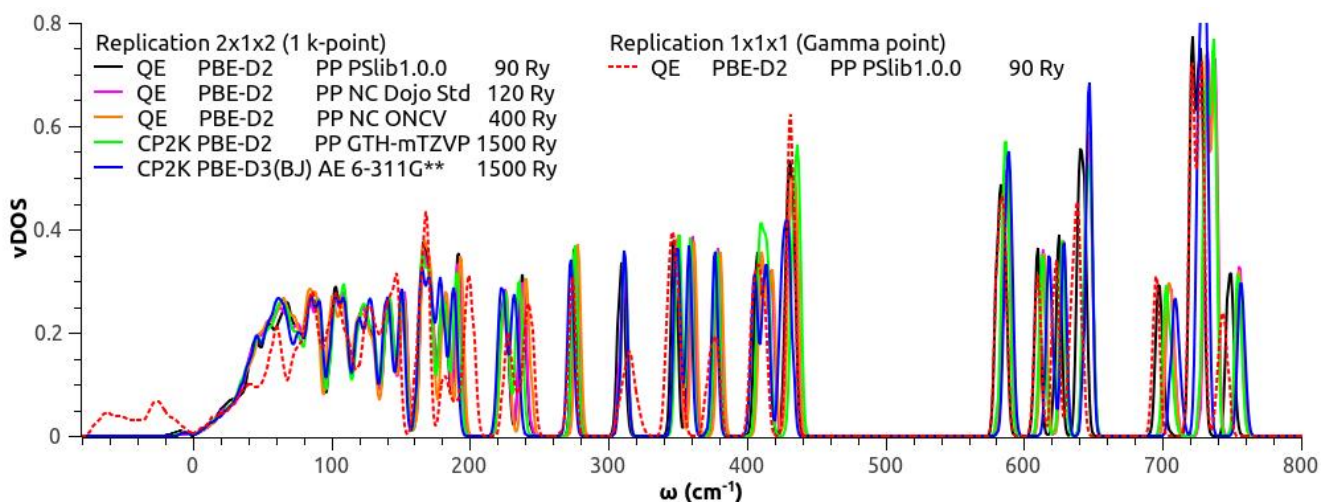

**Fig. S1.** Phonon density of states of  $\beta$ -HMX using various DFT-D combinations, from the structures optimized in Table SII. The quick calculations using a single cell and only the Gamma point for the phonon calculations is also the less accurate (red dotted curve). The other combinations agree very well with each other.

### 3. Additional QE and PHONOPY simulation parameters

**Table SIII.** Monkhorst-Pack parameters for variable-cell optimization of the unit cell, supercell size for phonon calculations, and resulting phonon bath extent  $\omega_{max}$  from phonon analysis (including highest X-NO<sub>2</sub> twisting modes).

|                  | Monkhorst-Pack off-grid k-point mesh | Supercell (unit cell replication) | Molecules in the supercell | Atom total | Irreducible representations | $\omega_{max}$ (cm <sup>-1</sup> ) |
|------------------|--------------------------------------|-----------------------------------|----------------------------|------------|-----------------------------|------------------------------------|
| PETN-I           | 2x2x3                                | 2x2x2                             | 16                         | 464        | 44                          | 125                                |
| BTF              | 3x1x3                                | 2x1x2                             | 16                         | 288        | 108                         | 153                                |
| $\beta$ -HMX     | 3x2x3                                | 2x1x2                             | 8                          | 224        | 84                          | 176                                |
| $\delta$ -HMX    | 3x3x1                                | 2x2x1                             | 24                         | 672        | 168                         | 152                                |
| $\alpha$ -NTO    | 4x3x2                                | 3x2x1                             | 48                         | 528        | 264                         | 171                                |
| HNB              | 2x3x3                                | 2x2x2                             | 32                         | 768        | 72                          | 166                                |
| Tetryl           | 2x3x2                                | 2x2x2                             | 32                         | 800        | 150                         | 204                                |
| HNAB             | 2x4x2                                | 1x3x1                             | 12                         | 432        | 432                         | 213                                |
| HNS              | 1x4x2                                | 1x3x1                             | 12                         | 456        | 228                         | 217                                |
| DIPAM            | 3x2x1                                | 2x1x1                             | 8                          | 288        | 216                         | 227                                |
| TNB              | 2x1x2                                | 2x1x2                             | 64                         | 1152       | 216                         | 152                                |
| MATB             | 4x3x2                                | 3x2x1                             | 24                         | 480        | 120                         | 161                                |
| DATB             | 3x4x2                                | 2x3x1                             | 12                         | 264        | 132                         | 181                                |
| TATB             | 2x2x3                                | 2x2x2                             | 16                         | 384        | 144                         | 133                                |
| $\alpha$ -FOX-7  | 3x3x2                                | 2x2x1                             | 16                         | 224        | 84                          | 172                                |
| $\alpha$ -CL20   | 3x2x1                                | 2x1x1                             | 16                         | 576        | 216                         | 153                                |
| $\beta$ -CL20    | 2x2x2                                | 2x2x2                             | 16                         | 576        | 216                         | 158                                |
| $\gamma$ -CL20   | 2x2x2                                | 2x2x2                             | 16                         | 576        | 216                         | 199                                |
| $\epsilon$ -CL20 | 2x2x2                                | 2x2x2                             | 16                         | 576        | 216                         | 178                                |
| MTNP             | 2x3x3                                | 1x2x2                             | 16                         | 288        | 108                         | 173                                |
| 2CL20:1HMX       | 1x2x2                                | 1x2x2                             | 16 + 8                     | 800        | 300                         | 166                                |
| 1CL20:1MTNP      | 3x2x2                                | 2x1x1                             | 4 + 4                      | 216        | 324                         | 190                                |

### 4. Comparison of the theoretical phonon vDOS to experimental INS spectra

Fig. S2 compares our calculated vDOS of  $\beta$ -HMX,  $\alpha$ -NTO, TATB and  $\alpha$ -FOX-7 to experimental spectra of inelastic neutron scattering (INS) performed at 20 K [5][6]. Peak positions agree within 3%. The largest relative deviation (8%) occurs at the upper part of the phonon bath of  $\alpha$ -FOX-7 (170 cm<sup>-1</sup>), which is good for this challenging low-frequency range [7]. Our all-electron calculations improve this range for  $\alpha$ -FOX-7 (blue curve in Fig. S2). Even though strong similitudes can be seen in the low-frequency range, we recall that a straight comparison of shape and intensity would require calculating neutron instead of phonon spectra.

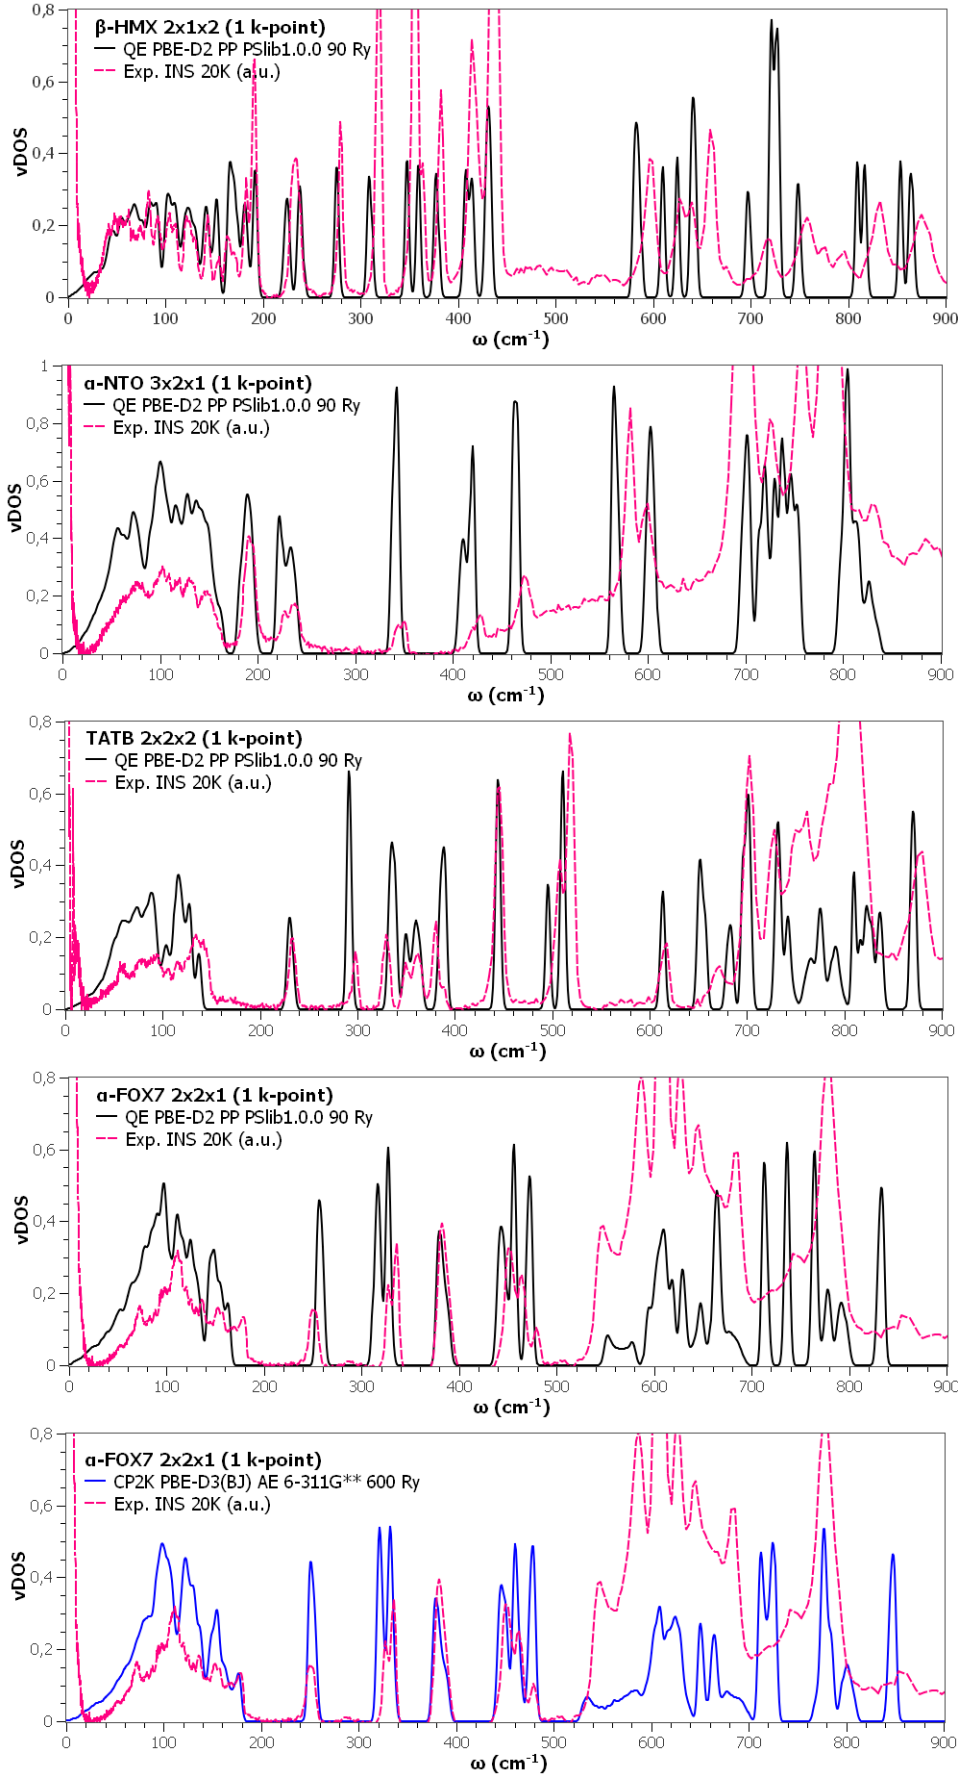

**Fig. S2.** Comparison of the theoretical phonon vDOS of  $\beta$ -HMX,  $\alpha$ -NTO, TATB and  $\alpha$ -FOX-7 to experimental spectra of inelastic neutron scattering performed at 20 K [5][6].

## 5. Optimized lattice parameters from DFT-D

Table SIV reports the results of the variable-cell relaxation as performed in section II.A. of the manuscript. The resulting structures agree very well with data at ambient conditions.

**TABLE SIV.** PBE-D2 optimizations at 0 K and 0 bar, using PSlb 1.0.0 US pseudopotential and 90 Ry energy cutoff.

| Name<br>Grp. Sym.<br>CCDC ref.    |           | a (Å)  | b (Å)  | c (Å)  | $\alpha$ (°) | $\beta$ (°) | $\gamma$ (°) | V (Å <sup>3</sup> ) | $\rho$ (g/cm <sup>3</sup> ) |
|-----------------------------------|-----------|--------|--------|--------|--------------|-------------|--------------|---------------------|-----------------------------|
| <b><math>\beta</math>-HMX</b>     | Exp. 303K | 6.526  | 11.037 | 7.364  |              | 102.67      |              | 517.45              | 1.901                       |
| P2 <sub>1</sub> /n                | PBE-D2    | 6.560  | 10.856 | 7.404  |              | 102.60      |              | 514.53              | 1.912                       |
| 792930                            | % dev     | +0.5   | -1.6   | +0.5   |              | -0.1        |              | -0.6                | +0.6                        |
| <b><math>\delta</math>-HMX</b>    | Exp. 295K | 7.711  |        | 32.553 |              |             | 120.00       | 1676.27             | 1.760                       |
| P6 <sub>1</sub>                   | PBE-D2    | 7.629  |        | 32.956 |              |             | 120.00       | 1661.15             | 1.776                       |
| 1225493                           | % dev     | -1.1   |        | +1.2   |              |             | 0.0          | -0.9                | +0.9                        |
| <b><math>\alpha</math>-FOX7</b>   | Exp. 298K | 6.934  | 6.623  | 11.312 |              | 90.06       |              | 519.47              | 1.893                       |
| P2 <sub>1</sub> /n                | PBE-D2    | 7.005  | 6.484  | 11.309 |              | 90.96       |              | 513.6               | 1.915                       |
| 616838                            | % dev     | +1.0   | -2.1   | -0.0   |              | +1.0        |              | -1.1                | +1.1                        |
| <b>PETN-I</b>                     | Exp. 295K | 9.386  |        | 6.715  |              |             |              | 591.57              | 1.774                       |
| P-42 <sub>1</sub> /n              | PBE-D2    | 9.390  |        | 6.669  |              |             |              | 588.03              | 1.785                       |
| 1231269                           | % dev     | +0.0   |        | -0.7   |              |             |              | -0.6                | +0.6                        |
| <b><math>\epsilon</math>-CL20</b> | Exp. Amb. | 8.852  | 12.556 | 13.386 |              | 106.82      |              | 1424.15             | 2.044                       |
| P2 <sub>1</sub> /n                | PBE-D2    | 8.939  | 12.661 | 13.428 |              | 106.46      |              | 1457.52             | 1.997                       |
| 117779                            | % dev     | +1.0   | +0.8   | +0.3   |              | -0.3        |              | +2.3                | -2.3                        |
| <b><math>\beta</math>-CL20</b>    | Exp. 293K | 9.676  | 13.006 | 11.649 |              |             |              | 1465.98             | 1.985                       |
| Pb2 <sub>1</sub> /a               | PBE-D2    | 9.682  | 13.301 | 11.553 |              |             |              | 1485.98             | 1.959                       |
| 117777                            | % dev     | +0.1   | +2.3   | -0.8   |              |             |              | +1.4                | -1.4                        |
| <b><math>\gamma</math>-CL20</b>   | Exp. 293K | 13.231 | 8.170  | 14.876 |              | 109.17      |              | 1518.89             | 1.916                       |
| P2 <sub>1</sub> /n                | PBE-D2    | 13.257 | 8.303  | 14.816 |              | 108.88      |              | 1543.23             | 1.886                       |
| 117778                            | % dev     | +0.2   | +1.6   | -0.4   |              | -0.3        |              | +1.6                | -1.6                        |
| <b><math>\alpha</math>-CL20</b>   | Exp. 293K | 9.485  | 13.225 | 23.673 |              |             |              | 2969.52             | 1.960                       |
| Pbca                              | PBE-D2    | 9.400  | 13.467 | 23.756 |              |             |              | 3007.10             | 1.936                       |
| 117776                            | % dev     | -0.9   | +1.8   | +0.3   |              |             |              | +1.3                | -1.3                        |
| <b>2CL20:</b>                     | Exp. 303K | 16.346 | 9.936  | 12.142 |              | 99.23       |              | 1946.42             | 2.001                       |
| <b>1HMX</b>                       | PBE-D2    | 16.440 | 9.996  | 12.376 |              | 99.89       |              | 2003.69             | 1.943                       |
| P2 <sub>1</sub> /n                | % dev     | +0.6   | +0.6   | +1.9   |              | +0.7        |              | +2.9                | -2.9                        |
| 792930                            |           |        |        |        |              |             |              |                     |                             |
| <b>BTF</b>                        | Exp. 295K | 6.923  | 19.516 | 6.518  |              |             |              | 880.64              | 1.901                       |
| Pna2 <sub>1</sub>                 | PBE-D2    | 7.010  | 19.700 | 6.575  |              |             |              | 908.04              | 1.844                       |
| 1118341                           | % dev     | +1.3   | +0.9   | +0.9   |              |             |              | +3.1                | +3.0                        |
| <b><math>\alpha</math>-NTO</b>    | Exp. 293K | 5.123  | 10.314 | 17.998 | 106.61       | 97.81       | 90.13        | 902.06              | 1.916                       |
| P $\bar{1}$                       | PBE-D2    | 5.148  | 10.422 | 17.612 | 107.26       | 97.67       | 90.11        | 893.48              | 1.934                       |
| 286331                            | % dev     | +0.5   | +1.0   | -2.1   | +0.6         | -0.1        | -0.0         | -0.9                | +0.9                        |
| <b>TNB</b>                        | Exp. 295K | 9.78   | 26.94  | 12.82  |              |             |              | 3377.73             | 1.676                       |
| Pbca                              | PBE-D2    | 9.571  | 27.067 | 12.693 |              |             |              | 3288.08             | 1.722                       |
| 1272828                           | % dev     | -2.1   | +0.5   | -1.0   |              |             |              | -2.7                | +2.7                        |
| <b>TATB</b>                       | Exp. 295K | 9.010  | 9.028  | 6.812  | 108.58       | 91.82       | 119.97       | 442.52              | 1.938                       |
| P $\bar{1}$                       | PBE-D2    | 9.096  | 9.109  | 6.606  | 109.71       | 91.31       | 119.94       | 434.08              | 1.975                       |
| 1266837                           | % dev     | +1.0   | +0.9   | -3.0   | +1.0         | +0.6        | +0.0         | -1.9                | +1.9                        |

TABLE SIV – cont.

| Name<br>Grp. Sym.<br>CCDC ref.                |           | a (Å)  | b (Å)  | c (Å)  | $\alpha$ (°) | $\beta$ (°) | $\gamma$ (°) | V (Å <sup>3</sup> ) | $\rho$ (g/cm <sup>3</sup> ) |
|-----------------------------------------------|-----------|--------|--------|--------|--------------|-------------|--------------|---------------------|-----------------------------|
| <b>MATB</b>                                   | Exp. 295K | 6.137  | 9.217  | 15.323 |              | 99.67       |              | 854.43              | 1.773                       |
| P2 <sub>1</sub> /n                            | PBE-D2    | 6.067  | 9.134  | 15.451 |              | 99.92       |              | 843.40              | 1.797                       |
| 1272844                                       | % dev     | -1.1   | -0.9   | +0.8   |              | +0.2        |              | -1.3                | +1.3                        |
| <b>DATB</b>                                   | Exp. 223K | 7.309  | 5.169  | 11.583 |              | 95.22       |              | 435.79              | 1.853                       |
| Pc                                            | PBE-D2    | 7.332  | 5.196  | 11.497 |              | 93.88       |              | 437.00              | 1.848                       |
|                                               | % dev     | +0.3   | +0.5   | -0.7   |              | -1.4        |              | +0.3                | -0.3                        |
| <b>DIPAM</b>                                  | Exp. 113K | 7.340  | 11.624 | 18.734 |              |             |              | 1598.34             | 1.825                       |
| P2 <sub>1</sub> 2 <sub>1</sub> 2 <sub>1</sub> | PBE-D2    | 7.387  | 11.813 | 18.824 |              |             |              | 1642.68             | 1.776                       |
| 822227                                        | % dev     | +0.6   | +1.6   | +0.5   |              |             |              | +2.8                | -2.8                        |
| <b>HNB</b>                                    | Exp. 295K | 13.220 | 9.130  | 9.680  |              | 95.55       |              | 1162.98             | 1.988                       |
| C2/c                                          | PBE-D2    | 13.267 | 9.009  | 9.768  |              | 96.32       |              | 1160.30             | 1.993                       |
| 1177301                                       | % dev     | +0.4   | -1.3   | +0.9   |              | +0.8        |              | -0.2                | +0.2                        |
| <b>HNAB</b>                                   | Exp. 298K | 15.401 | 5.524  | 22.118 |              | 110.34      |              | 1764.13             | 1.703                       |
| P2 <sub>1</sub>                               | PBE-D2    | 15.078 | 5.747  | 21.622 |              | 110.45      |              | 1755.49             | 1.711                       |
| 268091                                        | % dev     | -2.1   | +4.0   | -2.2   |              | +0.1        |              | -0.5                | +0.5                        |
| <b>HNS</b>                                    | Exp. 295K | 22.326 | 5.571  | 14.667 |              | 110.04      |              | 1713.68             | 1.745                       |
| P2 <sub>1</sub> /c                            | PBE-D2    | 21.646 | 5.621  | 15.036 |              | 112.43      |              | 1691.03             | 1.768                       |
| 1168120                                       | % dev     | -3.0   | +0.9   | +2.5   |              | +2.2        |              | -1.3                | +1.3                        |
| <b>Tetryl</b>                                 | Exp. 295K | 14.129 | 7.374  | 10.614 |              | 95.07       |              | 1101.52             | 1.731                       |
| P2 <sub>1</sub> /c                            | PBE-D2    | 14.408 | 7.234  | 10.492 |              | 96.24       |              | 1087.00             | 1.755                       |
| 1214794                                       | % dev     | +1.9   | -1.9   | -1.1   |              | +1.2        |              | -1.3                | +1.3                        |
| <b>MTNP</b>                                   | Exp. 293K | 11.921 | 8.339  | 8.476  |              |             |              | 842.61              | 1.711                       |
| Pna2 <sub>1</sub>                             | PBE-D2    | 11.797 | 8.267  | 8.480  |              |             |              | 826.98              | 1.744                       |
| 1056644                                       | % dev     | -1.0   | -0.9   | +0.0   |              |             |              | -1.9                | +1.9                        |
| <b>1CL20:</b>                                 | Exp. 293K | 8.351  | 11.430 | 11.940 |              | 98.66       |              | 1126.73             | 1.932                       |
| <b>1MTNP</b>                                  | PBE-D2    | 8.345  | 11.450 | 12.012 |              | 98.66       |              | 1134.61             | 1.918                       |
| P2 <sub>1</sub>                               |           |        |        |        |              |             |              |                     |                             |
| 1056638                                       | % dev     | -0.1   | +0.2   | +0.6   |              | -0.0        |              | +0.7                | -0.7                        |

## References

- [1] Q. Deng *et al.*, “Probing impact of molecular structure on mechanical property and sensitivity of energetic materials by machine learning methods,” *Chemometrics and Intelligent Laboratory Systems*, p. 104331, Apr. 2021, doi: 10.1016/j.chemolab.2021.104331.
- [2] X. Bidault and S. Chaudhuri, “Improved predictions of thermomechanical properties of molecular crystals from energy and dispersion corrected DFT,” *J. Chem. Phys.*, vol. 154, no. 16, p. 164105, Apr. 2021, doi: 10.1063/5.0041511.
- [3] B. W. ASAY, B. F. HENSON, L. B. SMILOWITZ, and P. M. DICKSON, “On the Difference in Impact Sensitivity of Beta and Delta HMX,” *Energetic Materials*, Jun. 2010, doi: 10.1080/713770434.
- [4] S. Zeman, M. JUNGOVÁ, and Q.-L. YAN, “Impact Sensitivity in Respect of the Crystal Lattice Free Volume and the Characteristics of Plasticity of Some Nitramine Explosives,” Dec. 25, 2015. [http://www.energetic-materials.org.cn/publish\\_article/2015/12/2015111.htm](http://www.energetic-materials.org.cn/publish_article/2015/12/2015111.htm) (accessed Apr. 13, 2021).
- [5] A. A. L. Michalchuk *et al.*, “Predicting the reactivity of energetic materials: an ab initio multi-phonon approach,” *Journal of Materials Chemistry A*, vol. 7, no. 33, pp. 19539–19553, 2019, doi: 10.1039/C9TA06209B.
- [6] A. A. L. Michalchuk, S. Rudić, C. R. Pulham, and C. A. Morrison, “Predicting the impact sensitivity of a polymorphic high explosive: the curious case of FOX-7,” *Chem. Commun.*, vol. 57, no. 85, pp. 11213–11216, Oct. 2021, doi: 10.1039/D1CC03906G.

- [7] P. A. Banks, Z. Song, and M. T. Ruggiero, "Assessing the Performance of Density Functional Theory Methods on the Prediction of Low-Frequency Vibrational Spectra," *J Infrared Milli Terahz Waves*, Jun. 2020, doi: 10.1007/s10762-020-00700-7.
